# Supplementary material for: Saccharin as a salt former. Enhanced solubilities of saccharinates of active pharmaceutical ingredients
Source: Royal Society of Chemistry journal article supplement (doi:10.1039/b416137h), 2005-01-01
Supplement: b416137h.pdf [file b416137h.pdf]

**Saccharin as a salt former. Enhanced solubilities of saccharinates of active  
pharmaceutical ingredients.**

Prashant M. Bhatt,<sup>a</sup> Nittala V. Ravindra,<sup>b</sup> Rahul Banerjee<sup>a</sup> and Gautam R. Desiraju<sup>\*a</sup>

<sup>a</sup> School of Chemistry, University of Hyderabad, Hyderabad 500046, India.

*E-mail: desiraju@uohyd.ernet.in*

<sup>b</sup> Informatics Division, GVK BIOSCIENCES Private Limited, 6-3-1192, Begumpet,  
Hyderabad 500 016, India

**Supplementary Material (ESI)**  
(5 pages)

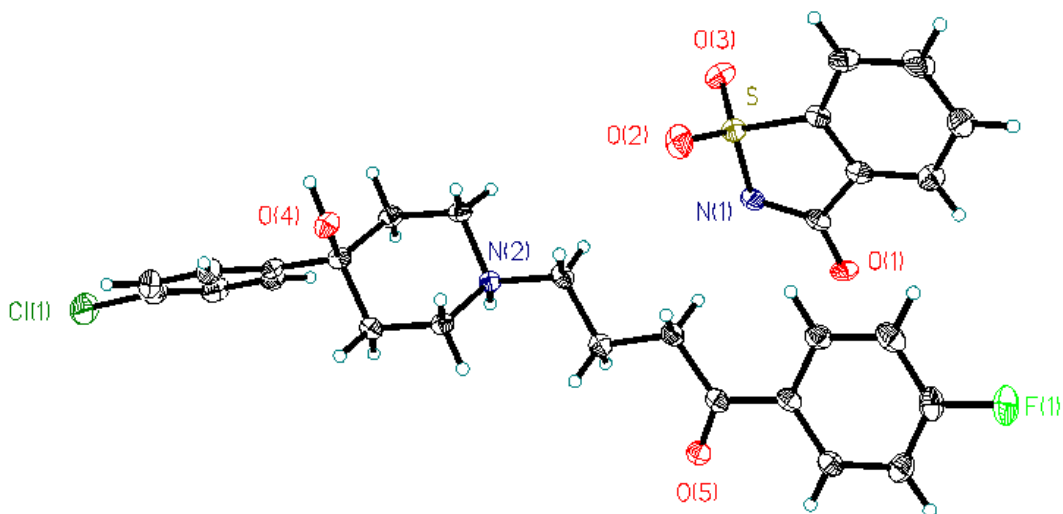

**Fig.1** ORTEP diagram of haloperidol saccharinate.

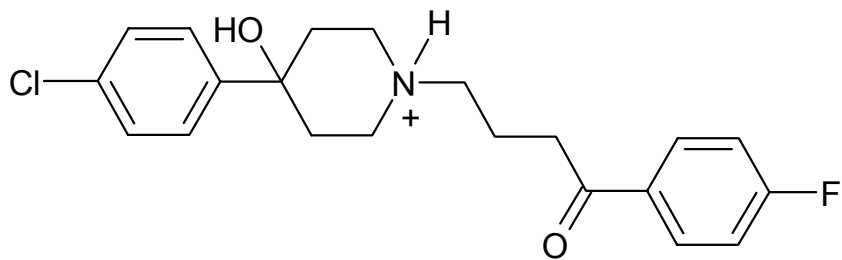

Haloperidol molecule as found in its saccharin adduct.

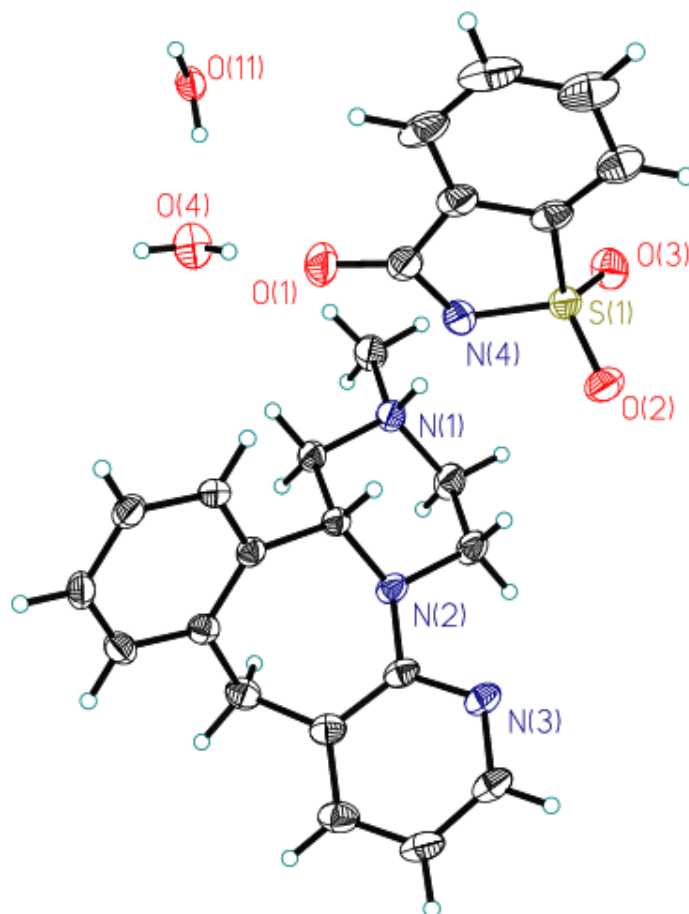

**Fig.2** ORTEP diagram of mirtazapine saccharinate.

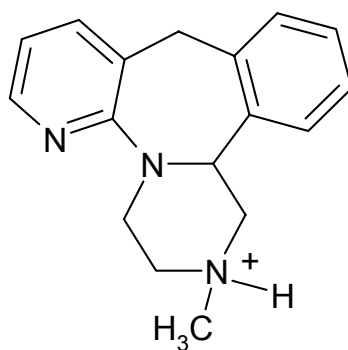

Mirtazapine molecule as found in its saccharin adduct.

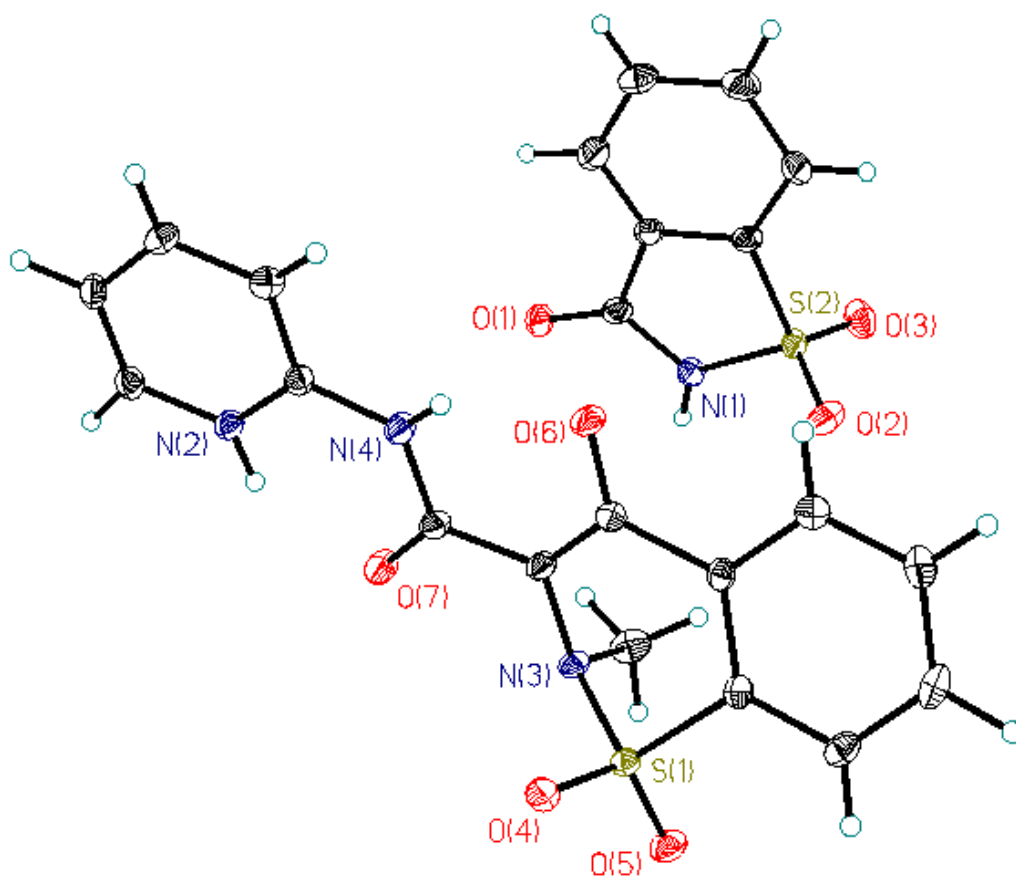

**Fig.3** ORTEP diagram of piroxicam–saccharin.

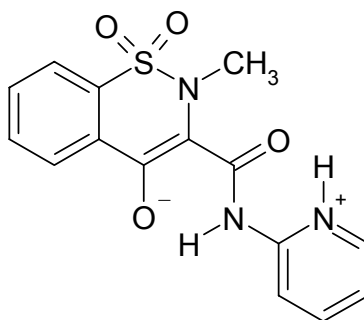

Piroxicam molecule as found in its saccharin adduct.

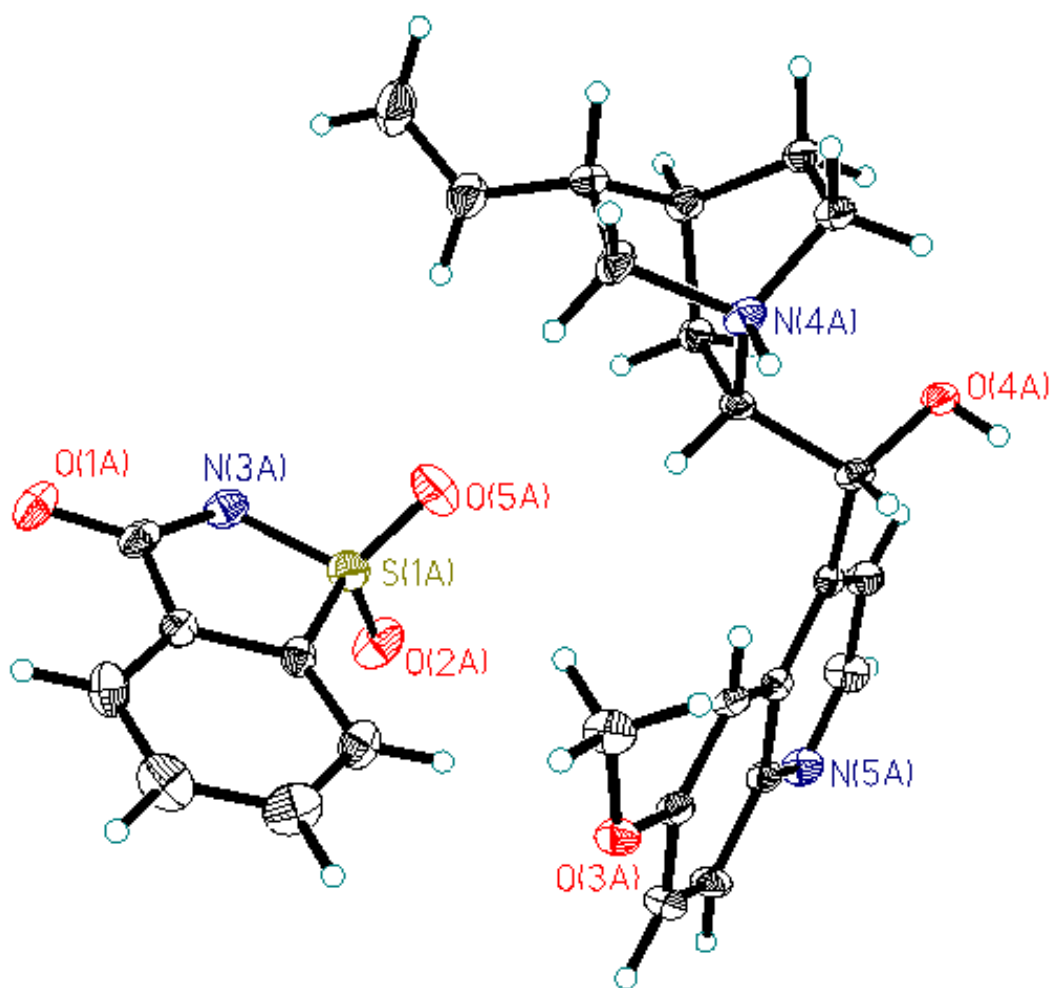

**Fig.4** ORTEP diagram of quinine saccharinate.

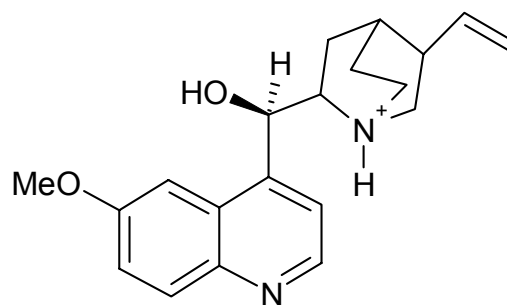

Quinine molecule as found in its saccharin adduct.
